# Supplementary material for: Self-setting bioceramic microscopic protrusions for transdermal drug delivery
Source: Royal Society of Chemistry journal article supplement (doi:10.1039/c4tb00764f), 2014-01-01
Supplement: c4tb00764f1.pdf [file c4tb00764f1.pdf]

† **Electronic Supplementary Information (ESI) available: [details of any supplementary information available should be included here]. See DOI: 10.1039/b000000x/**

### **Self-setting bioceramic microscopic protrusions for transdermal drug delivery**

*Bing Cai, Wei Xia\*, Susanne Bredenberg, Håkan Engqvist*

#### **Three-dimensional (3-D) image of SCMN**

Microtomography (microCT) was used to examine the sparsely arranged CaP SCMNs; the obtained projections were reconstructed into a 3-D image of the needles. A more detailed illustration of the needles can be found in the attached video 1.

#### **In vitro insertion of SCMN in porcine skin**

The CaP SCMNs was inserted manually into porcine skin, which was obtained from the back of porcine. The resulting porcine skin with SCMN after insertion was shown observed by microCT. A 3-D reconstruction of the microCT projection of *in vitro* insertion of CaP SCMNs into porcine skin was also presented. A closer examination of this is shown in the attached video 2.
